1 **Prevalence of pregnancy termination and associated factors**  
2 **among married women in Papua New Guinea: a nationally**  
3 **representative cross-sectional survey**

4

5 McKenzie Maviso<sup>1\*</sup>, Paula Z. Aines<sup>2</sup>, Gracelyn P. Potjepat<sup>2</sup>, Nancy Geregi<sup>3</sup>, Glen D.L. Mola<sup>4</sup>, John  
6 W. Bolnga<sup>5</sup>

7

8 <sup>1</sup>Division of Public Health, School of Medicine and Health Sciences, University of Papua New  
9 Guinea, Port Moresby, Papua New Guinea

10 <sup>2</sup>Division of Nursing, School of Medicine and Health Sciences, University of Papua New Guinea,  
11 Port Moresby, Papua New Guinea

12 <sup>3</sup>School of Health Sciences, Pacific Adventist University, Port Moresby, Papua New Guinea

13 <sup>4</sup>Department of Obstetrics and Gynaecology, School of Medicine and Health Sciences, University  
14 of Papua New Guinea, Port Moresby, Papua New Guinea

15 <sup>5</sup>Department of Obstetrics and Gynaecology, Modilon Hospital, Madang, Papua New Guinea

16

17 \*Corresponding author: [mckenzie.maviso@upng.ac.pg](mailto:mckenzie.maviso@upng.ac.pg)

18

19

20

21

22

23

24

25

26

27

28 **Prevalence of pregnancy termination and associated factors**  
29 **among married women in Papua New Guinea: a nationally**  
30 **representative cross-sectional survey**  
31

32 **Abstract**

33 **Background**

34 Pregnancy termination or induced abortion is not decriminalized, and access to safe abortion  
35 services is largely unavailable in Papua New Guinea (PNG). However, the practice is common  
36 throughout the country. This study aimed to estimate the prevalence and determine factors  
37 associated with pregnancy termination among married women aged 15–49 in PNG.

38 **Methods**

39 Secondary data from the 2016–2018 PNG Demographic and Health Survey (PNGDHS) was used.  
40 A total weighted samples of 6,288 married women were included. Complex Sample Analysis  
41 method was used to account for the cluster design and sample weight of the study. Chi-square tests  
42 and multivariable logistic regression were used to assess factors associated with pregnancy  
43 termination. Adjusted odds ratios (aORs) with 95% Confidence Intervals (CIs) were reported.

44 **Results**

45 The prevalence of pregnancy termination was 5.3%. Nearly half (45.2%) of all pregnancy  
46 terminations occurred in the Highlands region. Women aged 35–44 years (aOR = 8.54; 95% CI:  
47 1.61–45.26), not working (aOR = 6.17; 95% CI: 2.26–16.85), owned a mobile phone (aOR = 3.77;  
48 95% CI: 1.60–8.84), and lived in urban areas (aOR = 5.66; 95% CI: 1.91–16.81) were more likely  
49 to terminate a pregnancy. Women who experienced intimate partner violence (IPV) were 2.27 times  
50 (aOR = 2.27; 95% CI: 1.17–4.41) more likely to terminate a pregnancy compared to those who did  
51 not experience IPV. Women with unplanned pregnancies were 6.23 times (aOR = 6.23; 95% CI:  
52 2.61–14.87) more likely to terminate a pregnancy. Women who knew about modern contraceptive  
53 methods and made independent decisions for contraceptive use were 3.38 and 2.54 times (aOR =

54 3.38; 95% CI: 1.39–8.18 and aOR = 2.54; 95% CI: 1.18–5.45, respectively) more likely to  
55 terminate a pregnancy.

## 56 **Conclusion**

57 The findings highlight the role of sociodemographic and maternal factors in pregnancy termination  
58 among married women in PNG. Maternal age, occupation, mobile phone ownership, place of  
59 residence, IPV, unplanned pregnancy, knowledge of modern contraceptive methods, and decision-  
60 maker for contraceptive use were significantly associated with pregnancy termination. Efforts  
61 aimed at reducing unplanned pregnancies and terminations should focus on improving easy access  
62 to contraceptives and comprehensive sexual and reproductive health education for married couples.  
63 Post-abortion care should also be integrated into the country's legal framework and added as an  
64 important component of existing sexual and reproductive health services.

65

## 66 **Introduction**

67 While every pregnancy sets a woman at risk of death, the vulnerability to disability and maternal  
68 mortality is greater among women whose pregnancies are terminated through induced abortions,  
69 miscarriages, or stillbirths than among those who have live births [1,2]. Pregnancy termination, also  
70 known as induced abortion, is a medical or surgical intervention that involves removing a viable  
71 fetus, whereas spontaneous abortions (or miscarriages), occur when an embryo or fetus is lost due  
72 to natural causes [3]. In addition, induced abortion is permitted when there are compelling reasons,  
73 such as to save a woman's life, prevent adverse physical and mental health outcomes, avoid  
74 pregnancy following rape or incest, prevent serious fetal anomalies, socioeconomic reasons, or a  
75 woman's request [4–6]. Conversely, unsafe abortion is the termination of pregnancy performed by  
76 unskilled persons in an environment lacking primary medical and standard sanitary conditions, or  
77 both [7].

78         Recent global data showed that between 2015 and 2019, an estimated 121 million  
79 pregnancies that occurred were unintended [8]. Of these unintended pregnancies, 61% (73.3

80 million) resulted in abortion, consistent with a global abortion rate of 39 per 1,000 women aged 15–  
81 49 years [8]. An estimated 45% of all abortions are unsafe, and 97% occur in low- and middle-  
82 income countries (LMICs) [4,8]. Likewise, about 4.7–13.2% of all global maternal deaths each year  
83 are attributed to unsafe abortion [4,9]. Disability and deaths associated with unsafe pregnancy  
84 termination persist as a public health burden, particularly in settings where health disparities are  
85 evident, and/or abortion laws are restrictive [8,10,11]. Similarly, in countries where patriarchal  
86 societies, cultural norms, religious beliefs, and economic factors influence women's decisions,  
87 pregnancy termination is never easy [12–14]. The practice remains prevalent in low- and middle-  
88 income countries (LMICs), where women of reproductive age (15–49 years) have high rates of  
89 unmet contraceptive needs [8,15]. On average, women in these countries have more pregnancies  
90 throughout their lifetime, and their risk of pregnancy-related disability and mortality remains higher  
91 than those living in high-income countries [8]. Unintended pregnancy can have substantial social,  
92 economic, psychological, and health consequences for women of reproductive age and their  
93 families [16–18].

94 Many countries still confront health challenges due to the complexity of abortion laws and  
95 poor abortion healthcare services, and even where abortions are legal, the policies are hindered by  
96 the practice or incoherence [11,19]. Unsafe abortion has adverse health and economic implications  
97 for individuals and society [9,20]. Studies have revealed that unintended pregnancy has substantial  
98 social, economic, psychological, and health consequences for women of reproductive age and their  
99 families [16–18]. An earlier World Health Organization (WHO) systematic analysis highlighted  
100 five primary complications that accounted for 75% of all pregnancy-related deaths, which include  
101 hemorrhage, infection, pre-eclampsia and eclampsia, birth complications, and unsafe abortion [9]. It  
102 can also be aggravated by specific predisposing co-morbidities such as obesity, asthma, diabetes,  
103 and hypertension in women with a higher risk of pregnancy termination [21–24].

104 Despite the high risk of disability and death, the choice to undergo a pregnancy termination  
105 is personal and may be affected by several circumstance-specific considerations and healthcare

106 services. For instance, evidence from population-based surveys in LMICs revealed that  
107 demographic (e.g., age, marital status, parity, education), socioeconomic (e.g., employment), health  
108 risk behaviors (e.g., substance abuse, sexual activities), and sociocultural (e.g., gender norms, belief  
109 systems) factors are associated with pregnancy termination [10,14,25]. Previous experience with  
110 pregnancy termination, access to reproductive health services, and attitudes towards this practice  
111 have also been well documented [13,25]. Along with adverse health and socioeconomic  
112 consequences, decision-making regarding pregnancy termination is problematic, notably where  
113 patriarchy, restricted abortion laws, cultural and religious beliefs, and economic factors may impact  
114 women's decisions, especially in resource-constrained settings with already overloaded health  
115 systems [11].

116 In PNG, the risk of maternal and neonatal deaths due to pregnancy- and childbirth-related  
117 complications is disproportionately higher compared to other countries in the Western Pacific  
118 region [26,27]. The maternal mortality ratio is estimated to be 215–545 deaths per 100,000 live  
119 births [26,28]. Sepsis due to unsafe abortion is one of the leading causes of maternal mortality after  
120 hemorrhage in the country [27,29]. Regarding contraceptive use, the country has a low prevalence  
121 rate for modern contraceptive methods among married women (31%), and a high unmet need for  
122 family planning (26%) [30].

123 While pregnancy termination or induced abortion for socioeconomic reasons or upon  
124 request is prohibited under PNG's *Criminal Code Act 1974* [31], it is performed by a professional  
125 medical practitioner under certain conditions; for example, if the pregnancy is caused by rape or  
126 incest, if continuing the pregnancy places a woman's life or her physical or mental health at  
127 significant risk, or the child may experience a severe physical abnormality or disease [31].

128 Nonetheless, this practice continues to be contested in the country, with vested interests from  
129 politically and religiously conservative spheres, patriarchal societies, and sociocultural belief  
130 systems [31,32]. Moreover, the majority of women are unaware of the legal implications following  
131 pregnancy termination, especially illegal and unsafe abortion, which is known to be widely

132 performed in the country [33–35]. Evidence from PNG sources suggests that many women of  
133 reproductive age (15–49 years) with unplanned pregnancies perform unsafe abortions, which may  
134 result in abortion-related morbidity and mortality [26,29,33,36]. Previous reviews in the Eastern  
135 Highlands Province found that unsafe abortion infection accounted for 48% of maternal mortality  
136 [29], and 24% of women who sought post-abortion care were due to unsafe abortions [35]. Another  
137 study in Madang found that more than three-quarters (76.5%) of abortion-related admissions were  
138 due to continuous bleeding following an induced abortion [37]. Pregnancy-related complications,  
139 including unsafe abortion practices, contribute to the country’s poor maternal health indicators.

140         Considering the morbidity and mortality associated with the complications of pregnancy  
141 terminations, particularly unsafe abortions in PNG, it is imperative to fully understand the  
142 prevalence and associated factors to adequately address this issue. Although a few studies have  
143 determined the factors associated with pregnancy termination, country-level estimates of the  
144 prevalence and their determinants are largely undetermined, affecting a significant proportion of  
145 women in the reproductive age group [14]. Therefore, this study aimed to estimate the prevalence  
146 and determine factors associated with pregnancy termination among married women aged 15–49 in  
147 PNG. This could encourage program planning and policy development to establish a well-defined  
148 legal framework for implementing abortion services in the country.

149

## 150 **Materials and methods**

### 151 **Study setting**

152 This study used secondary data from the PNG Demographic and Health Survey (PNGDHS), a  
153 nationally representative population-based survey conducted across the four major administrative  
154 regions (Southern, Highlands, Momase, and Islands) from October 2016 to December 2018.

155

## 156 **Study design and data source**

157 Data were drawn from the PNGDHS 2016–2018, conducted every five years, employing a stratified  
158 two-stage cluster sampling design. In the first stage, census blocks are selected with systematic  
159 proportional and stratified sampling by urban and rural areas (except for the National Capital  
160 District, which does not have rural areas). In the second stage, a fixed number of 24 households per  
161 cluster are selected with an equal probability of systematic selection. A total of 17,505 households  
162 were selected for the sample, of which 16,754 were occupied. Of the occupied households, 16,021  
163 were interviewed. In the interviewed households, 18,175 women were identified for interviews, and  
164 15,198 women participated successfully, yielding a response rate of 84%. The data used in the  
165 analyses were weighted to explain variations in the probability of selection and non-response. In  
166 this study, a weighted sub-sample consisted of 6,288 married women aged 15–49 years who were  
167 married or in a formal union and who had ever been pregnant with complete cases on all of the  
168 variables studied were included. Women with missing information, never been married, and never  
169 had sex were excluded from the study because they had no risk of terminating a pregnancy (Fig 1).  
170 Detailed sampling procedures have been reported [30].

171

172 **Fig 1.** Flowchart of participant selection for this study.

173

## 174 **Definition of variables**

### 175 **Dependent variable**

176 The dependent variable for this study was pregnancy termination. Women were asked whether they  
177 had ever terminated a pregnancy. Information about the dependent variable was generated from this  
178 question. Respondents provided a “yes” or “no” as a response to the question to indicate whether  
179 they had ever terminated a pregnancy or not. Based on their responses, a dichotomous response of

180 ‘Yes’ was coded ‘1’ when a woman reported that she had terminated a pregnancy, and ‘No’ was  
181 coded ‘0’ if she had not.

## 182 **Independent variables**

183 The independent variables were selected based on their availability in the dataset, practical  
184 significance, and theoretical relevance reported in the literature about pregnancy termination  
185 [14,38,39]. Variables were categorized into maternal, household, and maternal health-related  
186 characteristics. Maternal characteristics include age, educational level, literacy, occupation, mobile  
187 phone ownership, internet use, and place of residence. Household characteristics include the  
188 husband’s age, educational level, and occupation, the household wealth index, and the number of  
189 children living. Additionally, participants were asked whether they had experienced intimate partner  
190 violence (IPV) during their pregnancies. Their responses were categorized as having experienced  
191 IPV due to one or more of the following: being humiliated, threatened, insulted, pushed, slapped,  
192 punched with a fist, or hit with an object; being kicked, burned, threatened, or attacked with a knife;  
193 being twisted; being physically forced to have sexual intercourse; being physically forced to have  
194 any other sexual act; or performing any sexual acts against their will during pregnancy [30].  
195 Maternal health-related characteristics include the last pregnancy being planned, knowledge of  
196 modern contraceptive methods, decision-maker for contraceptive use, knowledge of the menstrual  
197 cycle, number of antenatal visits, births in the last three years, and birth order.

## 198 **Operational definition**

199 Pregnancy termination or induced abortion: a pregnancy that is terminated by choice through an  
200 intervention. For this study, the terms pregnancy termination and abortion are used interchangeably.

## 201 **Statistical analysis**

202 Analyses were restricted to participants with complete data for the variables of interest. Sample  
203 weights were used in all analyses to adjust for disproportionate sampling and obtain reliable  
204 estimates and standard errors. Descriptive statistics were computed to report frequencies and



205 percentages of the sample's characteristics. The Chi-square test of independence was used to assess  
206 the association between the dependent and independent variables. Variables with a  $p < 0.2$  in the  
207 bivariate analysis were retained and included in the multivariate logistic regression analysis. The  
208 variance inflation factor was used to check for multicollinearity, and there was no evidence of  
209 multicollinearity. The model's fitness was checked using Hosmer and Lemeshow [40]. To account  
210 for the multistage sampling design and sample weight, a complex samples analysis technique was  
211 used, which provided generalizable and accurate estimates of proportion, probability values, and  
212 odds ratios [41]. Adjusted odds ratios (aORs) with 95% confidence intervals (Cis) were reported. A  
213  $p\text{-value} \leq 0.05$  was considered statistically significant. Analyses were performed using IBM SPSS  
214 Statistics for Windows, Version 26.0 (IBM Corp., Armonk, NY, USA).

215

## 216 **Ethical considerations**

217 Permission to access the datasets was obtained from the DHS Program and was only used for this  
218 study and not shared with a third party. The Institutionalized Review Board (IRB), the DHS survey  
219 implementing agency, and the IRB in host countries approved the survey protocols, ensuring ethical  
220 conduct in accordance with human subject research. Further ethical approval for this study was not  
221 required since data are available in the public domain (<https://dhsprogram.com/>). Written informed  
222 consent was obtained from the participants before each interview [30]. All the information about the  
223 participants had been anonymized before accessing the dataset for final analysis.

224

## 225 **Results**

### 226 **Characteristics of the study participants**

227 A total of 6,288 married women were included in the study. The mean age was 29.13 ( $\pm 9.61$ )  
228 years. Nearly half of the women were aged 25–34 (47.9%) and had primary education (49.1%). The  
229 majority of them lived in rural areas (80.6%) and were not working (66.8%). Over half (51.9%)

230 reported that they had experienced IPV from their husbands. Most women who planned their last  
 231 pregnancies (80.6%) knew about modern contraceptive methods (86.4) and had menstrual cycle  
 232 knowledge (77.7%). Similarly, over half (59.6%) of them made a joint decision (with their  
 233 husbands) about contraceptive use and had one pregnancy (63.3%) in the past three years preceding  
 234 the survey (Table 1).  
 235

**Table 1. Characteristics of the study participants (N = 6,288)**

| Characteristics                     | Frequency (n) | Percent (%) |
|-------------------------------------|---------------|-------------|
| <i>Maternal factors</i>             |               |             |
| Age (years)                         |               |             |
| 15–24                               | 1,536         | 24.4        |
| 25–34                               | 3,010         | 47.9        |
| 35–44                               | 1,561         | 24.8        |
| 45–49                               | 181           | 2.9         |
| Mean age (SD) = 29.13 ( $\pm$ 9.61) |               |             |
| Educational level                   |               |             |
| No formal education                 | 1,612         | 25.6        |
| Primary                             | 3,082         | 49.1        |
| Secondary                           | 1,336         | 21.2        |
| Higher                              | 258           | 4.1         |
| Literacy (n = 6,259)                |               |             |
| Cannot read/write                   | 2,312         | 36.9        |
| Can read/write                      | 3,947         | 63.1        |
| Occupation                          |               |             |
| Not working                         | 4,199         | 66.8        |
| Working                             | 2,089         | 33.2        |
| Tobacco/cigarette smoking           |               |             |
| No                                  | 4,920         | 78.2        |
| Yes                                 | 1,368         | 21.8        |
| Mobile phone ownership              |               |             |
| No                                  | 4,362         | 69.4        |
| Yes                                 | 1,926         | 30.6        |
| Place of residence                  |               |             |
| Urban                               | 703           | 11.2        |
| Rural                               | 5,586         | 88.8        |

|                                               |       |      |
|-----------------------------------------------|-------|------|
| <b><i>Household factors</i></b>               |       |      |
| Age of husband (years) (n = 3,917)            |       |      |
| 15–24                                         | 312   | 8.0  |
| 25–34                                         | 1,371 | 35.0 |
| 35–44                                         | 1,308 | 33.4 |
| 45 or more                                    | 925   | 23.6 |
| Educational level (husband) (n = 4,252)       |       |      |
| No formal education                           | 920   | 21.6 |
| Primary                                       | 1,929 | 45.4 |
| Secondary                                     | 1,165 | 27.4 |
| Higher                                        | 237   | 5.6  |
| Occupation (husband) (n = 5,583)              |       |      |
| Not working                                   | 2,773 | 49.7 |
| Working                                       | 2,809 | 50.3 |
| Wealth index                                  |       |      |
| Poorest                                       | 1,335 | 21.2 |
| Poorer                                        | 1,246 | 19.8 |
| Middle                                        | 1,245 | 19.8 |
| Richer                                        | 1,250 | 19.9 |
| Richest                                       | 1,212 | 19.3 |
| Number of children living                     |       |      |
| 1                                             | 1,461 | 23.2 |
| 2                                             | 1,293 | 20.6 |
| 3 or more                                     | 3,533 | 56.2 |
| Intimate partner violence (IPV) (n = 2,500)   |       |      |
| No                                            | 1,203 | 48.1 |
| Yes                                           | 1,297 | 51.9 |
| <b><i>Maternal health-related factors</i></b> |       |      |
| Last pregnancy planned                        |       |      |
| No                                            | 1,216 | 19.3 |
| Yes                                           | 5,072 | 80.7 |
| Knowledge of modern contraceptive methods     |       |      |
| No                                            | 855   | 13.6 |
| Yes                                           | 5,433 | 86.4 |
| Knowledge of the ovulatory cycle              |       |      |
| No                                            | 1,401 | 22.3 |
| Yes                                           | 4,887 | 77.7 |

|                                                  |       |      |
|--------------------------------------------------|-------|------|
| Decision-maker for contraceptive use (n = 1,646) |       |      |
| Respondent                                       | 454   | 27.6 |
| Husband/partner                                  | 199   | 12.0 |
| Joint decision                                   | 993   | 60.4 |
| Number of antenatal visits (n = 2,655)           |       |      |
| No visits                                        | 642   | 24.2 |
| 1–3                                              | 563   | 21.2 |
| 4 or more                                        | 1,450 | 54.6 |
| Birth order                                      |       |      |
| 1 <sup>st</sup>                                  | 1,356 | 21.6 |
| 2 <sup>nd</sup>                                  | 1,246 | 19.8 |
| 3 <sup>rd</sup>                                  | 1,178 | 18.7 |
| 4 <sup>th</sup> or more                          | 2,508 | 39.9 |
| Births in the last 3 years (n = 1,627)           |       |      |
| 1                                                | 3,978 | 85.4 |
| 2                                                | 658   | 14.1 |
| 3                                                | 25    | 0.5  |

236

## 237 **Prevalence of pregnancy termination**

238 The prevalence of pregnancy termination was 5.3% (95% CI: 0.05–0.06) among married women of  
 239 reproductive age (15–49 years) in PNG. When compared to the three administrative regions, the  
 240 rates of pregnancy termination remained high in the Highlands (45.2%) (Fig 2).

241

242 **Fig 2.** The rates of pregnancy terminations by region in PNG.

243

## 244 **Bivariate analysis of factors of pregnancy termination**

245 Among women who had terminated a pregnancy, half (50.7%) of them were between the ages of 25  
 246 to 34 years. Many (42.6%) had primary education, while 53% were unemployed. Similarly, 43% of  
 247 women’s husbands had primary education, and 64.3% were employed. The majority (71.5%)  
 248 experienced intimate partner violence. Less than half (46.2%) of the respondents made independent  
 249 decisions regarding contraceptive use. The Chi-square analysis revealed that maternal age,

250 educational level, occupation, mobile phone ownership, internet use, place of residence, husband's  
 251 occupation, household wealth index, number of children living, IPV experience, knowledge of  
 252 modern contraceptive methods, decision-maker for contraceptive use, menstrual cycle knowledge,  
 253 births in the last three years, and birth order were found to be statistically significant factors of  
 254 pregnancy termination (Table 2).  
 255

**Table 2. Bivariate analysis of factors of pregnancy termination (N = 6,288)**

| Characteristics           | Pregnancy termination |             |            |            | p-value*         |
|---------------------------|-----------------------|-------------|------------|------------|------------------|
|                           | No                    | %           | Yes        | %          |                  |
| <b>Sample</b>             | <b>5,948</b>          | <b>94.7</b> | <b>340</b> | <b>5.3</b> |                  |
| <i>Maternal factors</i>   |                       |             |            |            |                  |
| Age (years)               |                       |             |            |            | <b>0.023</b>     |
| 15–24                     | 1,473                 | 24.8        | 63         | 18.6       |                  |
| 25–34                     | 2,837                 | 47.7        | 172        | 50.7       |                  |
| 35–44                     | 1,463                 | 24.6        | 98         | 28.9       |                  |
| 45–49                     | 175                   | 2.9         | 6          | 1.8        |                  |
| Educational level         |                       |             |            |            | <b>&lt;0.001</b> |
| No formal education       | 1,558                 | 26.2        | 54         | 15.9       |                  |
| Primary                   | 2,937                 | 49.4        | 145        | 42.6       |                  |
| Secondary                 | 1,246                 | 20.9        | 90         | 26.5       |                  |
| Higher                    | 207                   | 3.5         | 51         | 15.0       |                  |
| Literacy (n = 6,259)      |                       |             |            |            | <b>&lt;0.001</b> |
| Cannot read/write         | 2,220                 | 37.5        | 92         | 27.1       |                  |
| Can read/write            | 3,700                 | 62.5        | 247        | 72.9       |                  |
| Occupation                |                       |             |            |            | <b>&lt;0.001</b> |
| Not working               | 4,019                 | 67.6        | 180        | 52.9       |                  |
| Working                   | 1,929                 | 32.4        | 160        | 47.1       |                  |
| Tobacco/cigarette smoking |                       |             |            |            | <b>0.001</b>     |
| No                        | 4,680                 | 78.7        | 240        | 70.8       |                  |
| Yes                       | 1,268                 | 21.3        | 99         | 29.2       |                  |
| Mobile phone ownership    |                       |             |            |            | <b>&lt;0.001</b> |
| No                        | 4,159                 | 69.9        | 203        | 59.7       |                  |
| Yes                       | 1,789                 | 30.1        | 137        | 40.3       |                  |
| Place of residence        |                       |             |            |            | <b>&lt;0.001</b> |
| Urban                     | 633                   | 10.3        | 70         | 20.6       |                  |

|                                                         |       |      |     |      |        |
|---------------------------------------------------------|-------|------|-----|------|--------|
| Rural                                                   | 5,315 | 89.4 | 270 | 79.4 |        |
| <b><i>Household factors</i></b>                         |       |      |     |      |        |
| Age of husband (years) (n = 3,917)                      |       |      |     |      | 0.624  |
| 15–24                                                   | 296   | 8.0  | 17  | 8.7  |        |
| 25–34                                                   | 1,299 | 34.9 | 72  | 36.7 |        |
| 35–44                                                   | 1,251 | 33.6 | 57  | 29.1 |        |
| 45 or more                                              | 875   | 23.5 | 50  | 25.5 |        |
| Educational level of husband (n = 4,252)                |       |      |     |      | 0.320  |
| No formal education                                     | 880   | 21.8 | 40  | 18.7 |        |
| Primary                                                 | 1,837 | 45.5 | 92  | 43.0 |        |
| Secondary                                               | 1,095 | 27.1 | 70  | 32.7 |        |
| Higher                                                  | 225   | 5.6  | 12  | 5.6  |        |
| Occupation of husband (n = 5,583)                       |       |      |     |      | <0.001 |
| Not working                                             | 2,672 | 50.4 | 101 | 35.7 |        |
| Working                                                 | 2,627 | 49.6 | 182 | 64.3 |        |
| Wealth index                                            |       |      |     |      | <0.001 |
| Poorest                                                 | 1,278 | 21.5 | 58  | 17.1 |        |
| Poorer                                                  | 1,204 | 20.2 | 42  | 12.4 |        |
| Rich                                                    | 1,176 | 19.8 | 70  | 20.6 |        |
| Richer                                                  | 1,177 | 19.8 | 72  | 21.2 |        |
| Richest                                                 | 1,113 | 18.7 | 98  | 28.8 |        |
| Number of children living                               |       |      |     |      | <0.001 |
| 1                                                       | 1,418 | 23.8 | 43  | 12.7 |        |
| 2                                                       | 1,219 | 20.5 | 74  | 21.8 |        |
| 3 or more                                               | 3,311 | 55.7 | 222 | 65.5 |        |
| Experienced intimate partner violence (IPV) (n = 2,500) |       |      |     |      | <0.001 |
| No                                                      | 1,158 | 49.4 | 45  | 28.5 |        |
| Yes                                                     | 1,184 | 50.6 | 113 | 71.5 |        |
| <b><i>Maternal health-related factors</i></b>           |       |      |     |      |        |
| Last pregnancy planned                                  |       |      |     |      | 0.306  |
| No                                                      | 1,143 | 19.2 | 73  | 21.5 |        |
| Yes                                                     | 4,805 | 80.8 | 267 | 78.5 |        |
| Knowledge of modern contraceptive methods               |       |      |     |      | <0.001 |
| No                                                      | 840   | 14.1 | 15  | 4.4  |        |
| Yes                                                     | 5,10  | 85.9 | 325 | 95.6 |        |
| Knowledge of the ovulatory cycle                        |       |      |     |      | 0.025  |
| No                                                      | 1,342 | 22.6 | 59  | 17.4 |        |

|                                                  |       |      |     |      |                  |
|--------------------------------------------------|-------|------|-----|------|------------------|
| Yes                                              | 4,606 | 77.4 | 281 | 82.6 |                  |
| Decision-maker for contraceptive use (n = 1,646) |       |      |     |      | <b>&lt;0.001</b> |
| Respondent                                       | 405   | 26.2 | 48  | 47.1 |                  |
| Husband/partner                                  | 180   | 11.7 | 19  | 18.6 |                  |
| Joint decision                                   | 959   | 62.1 | 35  | 34.3 |                  |
| Number of antenatal visits (n = 2,655)           |       |      |     |      | 0.660            |
| No visits                                        | 618   | 24.3 | 24  | 21.4 |                  |
| 1–3                                              | 536   | 21.1 | 27  | 24.1 |                  |
| 4 or more                                        | 1,389 | 54.9 | 61  | 54.5 |                  |
| Birth order                                      |       |      |     |      | <b>&lt;0.001</b> |
| 1 <sup>st</sup>                                  | 1,320 | 22.2 | 36  | 10.6 |                  |
| 2 <sup>nd</sup>                                  | 1,185 | 19.9 | 61  | 17.9 |                  |
| 3 <sup>rd</sup>                                  | 1,078 | 18.1 | 100 | 29.4 |                  |
| 4 <sup>th</sup> or more                          | 2,365 | 39.8 | 143 | 42.1 |                  |
| Births in the last 3 years                       |       |      |     |      | <b>0.002</b>     |
| 1                                                | 3,779 | 85.7 | 200 | 78.7 |                  |
| 2                                                | 608   | 13.8 | 50  | 19.7 |                  |
| 3                                                | 21    | 0.5  | 4   | 1.6  |                  |

\*Chi-square test,  $p \leq 0.05$

256

## 257 **Multivariable analysis of factors associated with pregnancy** 258 **termination**

259 In the multivariable analysis, maternal age, education, occupation, mobile phone ownership, place  
260 of residence, IPV, knowledge of modern contraceptive methods, decision-maker for contraceptive  
261 use, and number of children living were significantly associated with pregnancy termination.

262 Women aged 35–44 years (aOR = 8.54; 95% CI: 1.61–45.26), not working (aOR = 6.17; 95% CI:  
263 2.26–16.85), owned a mobile phone (aOR = 3.77; 95% CI: 1.60–8.84), and lived in urban areas

264 (aOR = 5.66; 95% CI: 1.91–16.81) were more likely to terminate a pregnancy. Women who

265 experienced IPV were 2.27 times (aOR = 2.27; 95% CI: 1.17–4.41) more likely to terminate a

266 pregnancy compared to those who did not experience IPV. Women with unplanned pregnancies

267 were 6.23 times (aOR = 6.23; 95% CI: 2.61–14.87) more likely to terminate a pregnancy. Women

268 who knew about modern contraceptive methods and made independent decisions for contraceptive

269 use were 3.38 and 2.54 times (aOR = 3.38; 95% CI: 1.39–8.18 and aOR = 2.54; 95% CI: 1.18–5.45,

270 respectively) more likely to terminate a pregnancy. However, those aged 15–24 (aOR = 0.62; 95%  
 271 CI: 0.07, 5.26), had husbands not working (aOR = 0.27; 95% CI: 0.12, 0.63), had husbands making  
 272 decisions for contraceptive use (aOR = 1.33; 95% CI: 0.54, 3.28), and had two children living (aOR  
 273 = 0.69; 95% CI: 0.96, 5.02) were less likely to terminate a pregnancy (Table 3).  
 274

**Table 3. Multivariable analysis of factors associated with pregnancy termination (N = 6,288)**

| Characteristics           | cOR (95% CI)       | aOR (95% CI)       | p-value*         |
|---------------------------|--------------------|--------------------|------------------|
| Age (years)               |                    |                    | <b>&lt;0.001</b> |
| 15–24                     | 1.34 (0.47, 3.81)  | 0.62 (0.07, 5.26)  |                  |
| 25–34                     | 1.89 (0.84, 4.28)  | 1.00 (0.17, 5.95)  |                  |
| 35–44                     | 2.09 (0.94, 4.66)  | 8.54 (1.61, 45.26) |                  |
| 45–49                     | Ref                | Ref                |                  |
| Educational level         |                    |                    | 0.292            |
| No formal education       | Ref                | Ref                |                  |
| Primary                   | 1.42 (0.86, 2.34)  | 0.89 (0.30, 2.65)  |                  |
| Secondary                 | 2.07 (1.23, 3.48)  | 1.12 (0.21, 5.81)  |                  |
| Higher                    | 7.10 (2.85, 17.68) | 0.30 (0.05, 2.00)  |                  |
| Literacy                  |                    |                    | 0.523            |
| Cannot read/write         | Ref                | Ref                |                  |
| Can read/write            | 1.62 (1.11, 2.35)  | 1.44 (0.47, 4.39)  |                  |
| Occupation                |                    |                    | <b>&lt;0.001</b> |
| Not working               | 0.54 (0.37, 0.79)  | 6.17 (2.26, 16.85) |                  |
| Working                   | Ref                | Ref                |                  |
| Tobacco/cigarette smoking |                    |                    | 0.487            |
| No                        | Ref                | Ref                |                  |
| Yes                       | 1.53 (0.89, 2.63)  | 1.38 (0.55, 3.45)  |                  |
| Mobile phone ownership    |                    |                    | <b>0.002</b>     |
| No                        | Ref                | Ref                |                  |
| Yes                       | 1.57 (1.06, 2.33)  | 3.77 (1.60, 8.84)  |                  |
| Place of residence        |                    |                    | <b>0.002</b>     |
| Urban                     | 2.19 (1.53, 3.13)  | 5.66 (1.91, 16.81) |                  |
| Rural                     | Ref                | Ref                |                  |
| Occupation (husband)      |                    |                    | <b>0.003</b>     |
| Not working               | 0.54 (0.37, 0.81)  | 0.27 (0.12, 0.63)  |                  |
| Working                   | Ref                | Ref                |                  |
| Wealth index              |                    |                    | 0.113            |



|                                             |                    |                    |                  |
|---------------------------------------------|--------------------|--------------------|------------------|
| Poorest                                     | Ref                | Ref                |                  |
| Poorer                                      | 0.77 (0.41, 1.44)  | 1.17 (0.43, 3.20)  |                  |
| Rich                                        | 1.31 (0.78, 2.19)  | 0.44 (0.13, 1.44)  |                  |
| Richer                                      | 1.35 (0.79, 2.32)  | 0.19 (0.04, 0.88)  |                  |
| Richest                                     | 1.95 (1.06, 3.59)  | 0.19 (0.04, 0.98)  |                  |
| Number of children living                   |                    |                    | <b>0.033</b>     |
| 1                                           | Ref                | Ref                |                  |
| 2                                           | 1.99 (1.19, 3.32)  | 0.69 (0.96, 5.02)  |                  |
| 3 or more                                   | 2.20 (1.36, 3.57)  | 0.07 (0.01, 0.95)  |                  |
| Experienced intimate partner violence (IPV) |                    |                    | <b>0.016</b>     |
| No                                          | Ref                | Ref                |                  |
| Yes                                         | 2.48 (1.52, 4.04)  | 2.27 (1.17, 4.41)  |                  |
| Last pregnancy planned                      |                    |                    | <b>&lt;0.001</b> |
| No                                          | 1.14 (0.77, 1.69)  | 6.23 (2.61, 14.87) |                  |
| Yes                                         | Ref                | Ref                |                  |
| Knowledge of modern contraceptive methods   |                    |                    | <b>0.007</b>     |
| No                                          | Ref                | Ref                |                  |
| Yes                                         | 3.65 (1.81, 7.36)  | 3.38 (1.39, 8.18)  |                  |
| Knowledge of the ovulatory cycle            |                    |                    | 0.923            |
| No                                          | Ref                | Ref                |                  |
| Yes                                         | 1.39 (0.88, 2.20)  | 0.96 (0.41, 2.27)  |                  |
| Decision-maker for contraceptive use        |                    |                    | <b>0.05</b>      |
| Respondent                                  | 3.29 (1.19, 9.09)  | 2.54 (1.18, 5.45)  |                  |
| Husband/partner                             | 2.89 (1.26, 6.65)  | 1.33 (0.54, 3.28)  |                  |
| Joint decision                              | Ref                | Ref                |                  |
| Birth order                                 |                    |                    | 0.394            |
| 1 <sup>st</sup>                             | 0.45 (0.27, 0.74)  | 0.07 (0.03, 1.68)  |                  |
| 2 <sup>nd</sup>                             | 0.85 (0.59, 1.22)  | 0.39 (0.06, 2.54)  |                  |
| 3 <sup>rd</sup>                             | 1.54 (0.82, 2.88)  | 0.59 (0.23, 1.53)  |                  |
| 4 <sup>th</sup> or more                     | Ref                | Ref                |                  |
| Birth in the last 3 years                   |                    |                    | 0.443            |
| 1                                           | Ref                | Ref                |                  |
| 2                                           | 1.57 (0.63, 3.88)  | 0.48 (0.16, 1.48)  |                  |
| 3                                           | 3.23 (0.66, 15.73) | –                  |                  |

\*p ≤ 0.05

cOR = crude odds ratio; aOR = adjusted Odds Ratio; CI = Confidence Interval; Ref = Reference category.

## 276 **Discussion**

277           The current study used nationally representative survey data and estimated the prevalence  
278 and determined factors of pregnancy terminations among married women of reproductive age in  
279 PNG. It was found that married women endure a disproportionate proportion of pregnancy  
280 terminations that remain prevalent in the country, despite their social and legal implications [34]. In  
281 multivariable logistic regression analysis, maternal age, maternal occupation, mobile phone  
282 ownership, place of residence, husband's occupation, IPV, pregnancy being planned, knowledge  
283 about modern contraceptive methods, and decision-maker for contraceptive use were found to be  
284 statistically significant factors in pregnancy termination.

285           The overall prevalence of pregnancy termination was 5.3%, with higher proportions  
286 reported from PNG's Highlands region (45.2%). The prevalence of pregnancy termination was  
287 relatively lower than that of studies from East Africa (7.8%) [39], including Ethiopia (8.5%) [10],  
288 and Sierra Leone [42]. This difference may have existed due to the study population, geography,  
289 and the accessibility and availability of sexual and reproductive health services, including maternal  
290 and child health programs over the years.

291           According to the study's results, being older was one of the major factors associated with  
292 pregnancy termination, particularly among women aged 35 or more. This finding was consistent  
293 with the results of prior studies conducted in 36 LMICs [14], including Ghana [43], Mozambique  
294 [43], and Sierra Leone [42], where women of advanced age had increased odds of pregnancy  
295 terminations compared to young women. A possible explanation could be that advanced maternal  
296 age predisposes women to medical and pregnancy-related complications such as pre-eclampsia,  
297 ectopic pregnancy, and gestational diabetes, including the unavoidable nature of maternal age,  
298 which may complicate pregnancy and lead to ending a pregnancy [14,44,45]. The positive  
299 association between married women and increased pregnancy termination rates could be due to the  
300 ineffectiveness or lack of contraceptive use [46]. Similarly, women who have reached their desired  
301 family size and believe they cannot get pregnant at that age have higher odds of terminating a

302 pregnancy. A perceived need or a lack of access to contraceptive use at the end of the reproductive  
303 years could be the possible reason [42].

304 The association between place of residence and pregnancy termination has received much  
305 consideration in numerous studies, demonstrating that women residing in urban areas are  
306 significantly more likely to terminate a pregnancy [10,14,37]. Compared to rural women in this  
307 study, those in urban areas were about six times more likely to terminate a pregnancy. Urban  
308 women may have access to abortion information and services, including self-induced abortion [47].  
309 On the contrary, the lower likelihood of pregnancy termination among rural women may be  
310 elucidated by the fact that access to abortion services, including sexual and reproductive health care  
311 is inadequate because of disparities in health service and resource allocations between rural and  
312 urban areas. Similarly, restrictive gender and sociocultural norms that influence the sexual and  
313 reproductive healthcare-seeking behavior of rural women may be a possible explanation for the low  
314 prevalence of pregnancy termination.

315 The current study found a statistically significant relationship between pregnancy  
316 termination and occupation, with the odds higher among women who were not working. These  
317 findings are comparable to previous studies [43,48], indicating a higher concentration of pregnancy  
318 terminations among socioeconomically disadvantaged women. Women who reported pregnancy  
319 termination may do so for financial constraints, partner-related reasons, or a desire to postpone  
320 childbearing, as demonstrated by prior studies [49,50]. Moreover, financial barriers may contribute  
321 to disparities in contraceptive usage among poor women, who may not be able to afford modern  
322 contraceptives compared to working women, resulting in terminating a pregnancy. In contrast, other  
323 studies found that working women had higher probabilities of terminating a pregnancy than their  
324 unemployed counterparts [25,42,43]. Studies have argued that educated and working women are  
325 financially empowered, prioritize employment continuity, have a greater awareness of contraceptive  
326 options, and can afford abortion services [42,43].

327 Compared to women who do not own mobile phones, the likelihood of terminating a  
328 pregnancy remained high among those who own mobile phones. This finding is contrary to  
329 previous studies [51–53], indicating that mobile phones in health (mHealth) have been shown to  
330 influence women's perceptions and decisions on pregnancy and abortion services and improve post-  
331 abortion care, including family planning. Mobile phone use has increased considerably, along with  
332 reducing its costs, and remains a popular means to seek healthcare or obtain information about  
333 health issues [54]. In addition, women who have access to social media may be aware of the  
334 abortion laws in their country and are less likely to be stigmatized by society in their quest to have a  
335 pregnancy terminated [43]. Further research is needed to determine the relationship between the use  
336 of mobile phones and pregnancy termination among married women.

337 The association between IPV and pregnancy termination revealed in this study bolsters the  
338 earlier findings that being in an abusive relationship may affect women's reproductive decision-  
339 making which can result in pregnancy termination [55–57]. Married women who experienced IPV  
340 were twice as likely to terminate a pregnancy, which corroborates a recent study from PNG [58]. It  
341 has been reported that over two-thirds of PNG women have suffered some form of physical or  
342 sexual violence in their lifetime [59]. Women in abusive relationships may likely have less control  
343 over their sexuality and as a result become pregnant more often than they should, which might lead  
344 to an increase in the incidence of pregnancy terminations [56,57]. Another possible explanation  
345 could be that the husband may be unwilling to accept the child and may use violence or other  
346 coercive means to force the woman to terminate the pregnancy, or negatively influence her  
347 decision. Moreover, women experiencing IPV may have less autonomy in sexual and reproductive  
348 health and are confronting the challenges of unmet contraceptive use and unintended pregnancies  
349 [55,58,60]. While terminating a pregnancy may most likely be the woman's choice, other options  
350 for her may also be limited in an abusive relationship. An insight into socioeconomic and  
351 demographic conditions sanctioning violence remains crucial and entails women's empowerment  
352 programs. The call to reinforce the *National Strategy to Prevent and Respond to Gender-Based*

353 *Violence* [61], and prioritize violence prevention, along with strengthening provisions for issuing  
354 interim and long-term protection orders for survivors is necessary. Furthermore, empowering  
355 women through education and social support can enhance their self-confidence and enable them to  
356 make informed decisions about sexual and reproductive health.

357 In this study, unplanned pregnancy was a significant predictor associated with increased  
358 odds of pregnancy termination. This is consistent with a previous study conducted in Kenya [62].  
359 One elucidation may be that unintended pregnancy mainly results from a lack of or inconsistent use  
360 of contraceptive methods, as reported in earlier studies [63,64]. Similarly, women may have  
361 insufficient or inaccurate knowledge and concerns about the side effects of contraception. Evidence  
362 has shown that contraception use is influenced by women's knowledge, beliefs, perceptions of  
363 health risks, and previous experience [65]. The inadequate provision of family planning services to  
364 address contraceptive needs for married women at risk of unintended pregnancies may lead to  
365 increased unwanted pregnancies, followed by pregnancy termination [65,66]. Effective  
366 contraception has several advantages, including better mother health and social and economic  
367 empowerment, while reducing the risk of an unplanned or undesired pregnancy [65]. Also, the need  
368 to improve family planning services while paying special attention, particularly for women of  
369 advanced age or those who prefer not to have children is warranted.

370 The current study complements the growing evidence that women who knew about modern  
371 contraceptive methods were three times more likely to terminate a pregnancy compared to their  
372 counterparts. This association corroborated recent findings in Ethiopia [10] and Nepal [67], where  
373 women with excellent contraceptive and abortion knowledge were likely to terminate a pregnancy  
374 than those with poor contraceptive knowledge. Similarly, this study found a significant association  
375 between individual decision-making regarding contraceptive use and pregnancy termination.  
376 Women who could make independent decisions about their reproductive health were more likely to  
377 terminate a pregnancy [25]. Women may foresee financial constraints associated with childrearing,  
378 social pressure against untimely pregnancies, and experiences of marital issues that encourage them

379 to terminate a pregnancy [58,68]. Another possible explanation could be that women who are  
380 educated and working have higher odds of decision-making power [69].

381         Concerning birth history, women with two or fewer children were less likely to terminate a  
382 pregnancy. This suggests that most women understand the importance of contraceptive use and  
383 have delayed childbearing or achieved the desired family size. Consistent with studies in sub-  
384 Saharan Africa [14,70], pregnancy termination rates remained low among women with fewer than  
385 four children. The probable reason may be that women with fewer children could do so due to  
386 effective contraceptive use, higher education attainment, and the probability of their involvement in  
387 income-generating activities. Another possible explanation is that women with living children may  
388 have a decreased future reproductive desire and a high intention to use contraceptives [71].

### 389 **Strengths and limitations of the study**

390 The study had several strengths. Data were drawn from a nationally representative survey  
391 conducted from 2016 to 2018, which was weighted to ensure representativeness and a valid  
392 estimate. The study also employed complex samples analysis to account for the multistage sampling  
393 design used in the PNGDHS and obtain a reliable standard error and estimate. However, this survey  
394 was cross-sectional, and the results cannot be used to make causal inferences. There is also a high  
395 probability of social desirability bias, which might result in underreporting. A plausible explanation  
396 is that women may be reluctant to admit to terminating a pregnancy as it is not decriminalized and  
397 for fear of experiencing intimate partner violence from their partners, where social and cultural  
398 norms influence women's decisions [34,58]. Furthermore, the PNGDHS database did not include  
399 methods of pregnancy termination with abortifacients such as misoprostol or mifepristone or any  
400 other non-conventional methods such as traditional herbs, barks, leaves, or traumatic physical  
401 injuries. Nonetheless, the questions were generalized retrospectively to establish the prevalence of  
402 pregnancy termination only.

## 403 **Implications for policy and practice**

404 Women who terminate a pregnancy outside the purview of the *Criminal Code Act* [31] are  
405 considered offenders in PNG. Abortion has not been decriminalized in the country, and the law only  
406 outlines the circumstances under which it will not be considered illegal. Nonetheless, the growing  
407 evidence of abortion-related complications requiring hospitalization, including disability and  
408 mortality, suggests that the practice remains prevalent and may increase. In consultation with  
409 qualified medical practitioners and professional bodies (the Professional Medical and  
410 Nursing/Midwifery Society and the National Department of Health), they need to recommend  
411 constitutional directives and reformation of the criminal law restricting access to termination of  
412 pregnancy. Furthermore, decriminalizing abortion should be viewed within a medical-legal  
413 paradigm while ensuring that the service is accessible and available to reduce adverse maternal  
414 health outcomes in the country.

415

## 416 **Conclusion**

417 The findings highlight the role of sociodemographic and maternal factors in pregnancy termination  
418 among married women in PNG. Maternal age, occupation, mobile phone ownership, place of  
419 residence, IPV, unplanned pregnancy, knowledge of modern contraceptive methods, and decision-  
420 maker for contraceptive use were significantly associated with pregnancy termination. Abortion-  
421 related complications and, in some cases, deaths are due to the criminalization of this health care  
422 issue, and it is inconsistent with human rights that this should be more so for the disadvantaged, the  
423 uneducated, the lower socioeconomic strata of society, and women living in rural areas. Efforts  
424 aimed at reducing unplanned pregnancies and terminations should focus on improving easy access  
425 to contraceptives and comprehensive sexual and reproductive health education. This is crucial for  
426 increasing self-confidence and enabling them to make informed decisions about their sexual and  
427 reproductive health. Furthermore, creating an enabling environment that respects and safeguards  
428 women's access to post-abortion care is warranted. This should also be expanded to the full extent

429 of the country's legal framework and added as an integral component of existing sexual and  
430 reproductive health services.

431

## 432 **Supporting information**

433 S1 Table. The STROBE guidelines for cross-sectional studies.

434

## 435 **Acknowledgments**

436 The authors would like to thank the DHS program and its partners for permitting them to analyze  
437 the dataset.

438

## 439 **Author contributions**

440 **Conceptualization:** McKenzie Maviso.

441 **Data curation:** McKenzie Maviso.

442 **Formal analysis:** McKenzie Maviso.

443 **Methodology:** McKenzie Maviso, Paula Zebedee Aines, Glen D.L. Mola, John W. Bolnga.

444 **Software:** McKenzie Maviso.

445 **Validation:** Paula Zebedee Aines, Gracelyn Potjepat, John W. Bolnga.

446 **Visualization:** McKenzie Maviso, Paula Zebedee Aines, Gracelyn Potjepat, John W. Bolnga.

447 **Writing – original draft:** McKenzie Maviso.

448 **Writing – review & editing:** McKenzie Maviso, Paula Zebedee Aines, Gracelyn Potjepat, Nancy

449 Geregl, Glen D.L. Mola, John W. Bolnga.

450



## 451 **Funding**

452 This research received no specific grant from any funding agency in the public, commercial, or not-  
453 for-profit sectors.

454

## 455 **Availability of Data and Materials**

456 Permission for accessing and analyzing the 2016–2018 PNGDHS data was obtained from the DHS  
457 Program. All data and DHS-related materials are available from the DHS team upon request at  
458 <https://dhsprogram.com/>

459

## 460 **Conflict of Interest**

461 The authors have declared that no competing interests exist.

462

## 463 **References**

- 464 1. Afiaz A, Biswas RK, Shamma R, Ananna N. Intimate partner violence (IPV) with  
465 miscarriages, stillbirths and abortions: Identifying vulnerable households for women in  
466 Bangladesh. *PLOS ONE*. 2020 Jul 28;15(7):e0236670.
- 467 2. Kuppusamy P, Prusty RK, Chaithanya IK, Gajbhiye RK, Sachdeva G. Pregnancy outcomes  
468 among Indian women: increased prevalence of miscarriage and stillbirth during 2015–2021.  
469 *BMC Pregnancy and Childbirth*. 2023 Mar 8;23(1):150.
- 470 3. World Health Organization. Safe abortion: technical and policy guidance for health systems  
471 [Internet]. 2nd ed. Geneva: World Health Organization; 2012. Available from:  
472 <https://apps.who.int/iris/handle/10665/70914>
- 473 4. World Health Organization. Abortion: Key facts [Internet]. 2021. Available from:  
474 <https://www.who.int/news-room/fact-sheets/detail/abortion>
- 475 5. Jadav D, C Bhargava D, Meshram V, S Shekhawat R, Kanchan T. Medical termination of  
476 pregnancy: A global perspective and Indian scenario. *Med Leg J*. 2024 Mar;92(1):34–42.
- 477 6. Abubeker FA, Lavelanet A, Rodriguez MI, Kim C. Medical termination for pregnancy in early  
478 first trimester ( $\leq 63$  days) using combination of mifepristone and misoprostol or misoprostol  
479 alone: a systematic review. *BMC Women's Health*. 2020 Dec;20(1):142.
- 480 7. Gebremedhin M, Semahegn A, Usmael T, Tesfaye G. Unsafe abortion and associated factors  
481 among reproductive aged women in Sub-Saharan Africa: a protocol for a systematic review  
482 and meta-analysis. *Systematic Reviews*. 2018 Aug 25;7(1):130.

- 483 8. Bearak J, Popinchalk A, Ganatra B, Moller AB, Tunçalp Ö, Beavin C, et al. Unintended  
484 pregnancy and abortion by income, region, and the legal status of abortion: estimates from a  
485 comprehensive model for 1990–2019. *The Lancet Global Health*. 2020 Sep 1;8(9):e1152–61.
- 486 9. Say L, Chou D, Gemmill A, Tunçalp Ö, Moller AB, Daniels J, et al. Global causes of maternal  
487 death: a WHO systematic analysis. *The Lancet Global Health*. 2014 Jun 1;2(6):e323–33.
- 488 10. Yemane GD, Korsaa BB, Jemal SS. Multilevel analysis of factors associated with pregnancy  
489 termination in Ethiopia. *Annals of Medicine and Surgery*. 2022 Aug 1;80:104120.
- 490 11. Allotey P, Ravindran TKS, Sathivelu V. Trends in Abortion Policies in Low- and Middle-  
491 Income Countries. *Annu Rev Public Health*. 2021 Apr 1;42(1):505–18.
- 492 12. Ahinkorah BO, Seidu AA, Hagan JE, Archer AG, Budu E, Adoboi F, et al. Predictors of  
493 Pregnancy Termination among Young Women in Ghana: Empirical Evidence from the 2014  
494 Demographic and Health Survey Data. *Healthcare*. 2021;9(6).
- 495 13. Lokubal P, Corcuera I, Balil JM, Frischer SR, Kayemba CN, Kurinczuk JJ, et al. Abortion  
496 decision-making process trajectories and determinants in low- and middle-income countries: A  
497 mixed-methods systematic review and meta-analysis. *eClinicalMedicine*. 2022 Dec  
498 1;54:101694.
- 499 14. Ba DM, Zhang Y, Pasha-Razzak O, Khunsriraksakul C, Maiga M, Chinchilli VM, et al.  
500 Factors associated with pregnancy termination in women of childbearing age in 36 low-and  
501 middle-income countries. *PLOS Global Public Health*. 2023 Feb 28;3(2):e0001509.
- 502 15. Kantorová V. Unintended pregnancy and abortion: what does it tell us about reproductive  
503 health and autonomy? *The Lancet Global Health*. 2020 Sep 1;8(9):e1106–7.
- 504 16. Mohamed EAEB, Hamed AF, Yousef FMA, Ahmed EA. Prevalence, determinants, and  
505 outcomes of unintended pregnancy in Sohag district, Egypt. *Journal of the Egyptian Public  
506 Health Association*. 2019 Mar 13;94(1):14.
- 507 17. Omani-Samani R, Amini Rarani M, Sepidarkish M, Khedmati Morasae E, Maroufizadeh S,  
508 Almasi-Hashiani A. Socioeconomic inequality of unintended pregnancy in the Iranian  
509 population: a decomposition approach. *BMC Public Health*. 2018 May 9;18(1):607.
- 510 18. Yazdkhasti M, Pourreza A, Pirak A, Abdi F. Unintended Pregnancy and Its Adverse Social  
511 and Economic Consequences on Health System: A Narrative Review Article. *Iran J Public  
512 Health*. 2015 Jan;44(1):12–21.
- 513 19. Zhou J, Blaylock R, Harris M. Systematic review of early abortion services in low- and  
514 middle-income country primary care: potential for reverse innovation and application in the  
515 UK context. *Globalization and Health*. 2020 Sep 30;16(1):91.
- 516 20. Sahoo H, Stillman M, Frost J, Acharya R, Hussain R. Availability, practices and acceptance of  
517 postabortion contraceptive services in health facilities: A study in six states of India.  
518 *Contraception*. 2020 Feb 1;101(2):106–11.
- 519 21. Blais L, Kettani FZ, Forget A. Relationship between maternal asthma, its severity and control  
520 and abortion. *Human Reproduction*. 2013 Apr 1;28(4):908–15.
- 521 22. Cavalcante MB, Sarno M, Peixoto AB, Araujo Júnior E, Barini R. Obesity and recurrent  
522 miscarriage: A systematic review and meta-analysis. *Journal of Obstetrics and Gynaecology  
523 Research*. 2019 Jan 1;45(1):30–8.
- 524 23. Su Y, Xie X, Zhou Y, Lin H, Li Y, Feng N, et al. Association of induced abortion with  
525 hypertensive disorders of pregnancy risk among nulliparous women in China: a prospective  
526 cohort study. *Scientific Reports*. 2020 Mar 20;10(1):5128.

- 527 24. Zhao Y, Zhao Y, Fan K, Jin L. Association of History of Spontaneous or Induced Abortion  
528 With Subsequent Risk of Gestational Diabetes. *JAMA Network Open*. 2022 Mar  
529 3;5(3):e220944–e220944.
- 530 25. Seidu AA, Ahinkorah BO, Ameyaw EK, Hubert A, Agbemavi W, Armah-Ansah EK, et al.  
531 What has women’s reproductive health decision-making capacity and other factors got to do  
532 with pregnancy termination in sub-Saharan Africa? evidence from 27 cross-sectional surveys.  
533 *PLOS ONE*. 2020 Jul 23;15(7):e0235329.
- 534 26. Grundy J, Dakulala P, Wai K, Maalsen A, Whittaker M. Independent State of Papua New  
535 Guinea Health System Review. World Health Organization. Regional Office for South-East  
536 Asia; 2019.
- 537 27. Robbers G, Vogel JP, Mola G, Bolnga J, Homer CSE. Maternal and newborn health indicators  
538 in Papua New Guinea – 2008–2018. *Sexual and Reproductive Health Matters*. 2019 Jan  
539 1;27(1):52–68.
- 540 28. Mola G, Kirby B. Discrepancies between national maternal mortality data and international  
541 estimates: the experience of Papua New Guinea. *Reproductive Health Matters*. 2013 Jan  
542 1;21(42):191–202.
- 543 29. Sanga K, de Costa C, Mola G. A review of maternal deaths at Goroka General Hospital, Papua  
544 New Guinea 2005–2008. *Australian and New Zealand Journal of Obstetrics and Gynaecology*.  
545 2010 Feb 1;50(1):21–4.
- 546 30. National Statistical Office (NSO) [Papua New Guinea], ICF. Papua New Guinea Demographic  
547 and Health Survey 2016-18 [Internet]. Port Moresby, Papua New Guinea, and Rockville,  
548 Maryland, USA: NSO and ICF; 2019. Available from:  
549 <https://www.dhsprogram.com/pubs/pdf/FR364/FR364.pdf>
- 550 31. Government of Papua New Guinea. Criminal Code Act 1974 pp.; Ordinance No.7 of 1902.  
551 revised 1974: Chapter 1262, parts 25,26,80. Government of Papua New Guinea; 1974.
- 552 32. Kolodziejczyk I, Kuzma J. Knowledge and Attitudes Towards Abortion and Euthanasia  
553 Among Health Students in Papua New Guinea. *Advances in Medical Education and Practice*.  
554 2020 Dec 31;11:977–87.
- 555 33. Asa I, de Costa C, Mola G. A prospective survey of cases of complications of induced  
556 abortion presenting to Goroka hospital, Papua New Guinea, 2011. *Australian and New  
557 Zealand Journal of Obstetrics and Gynaecology*. 2012 Oct 1;52(5):491–3.
- 558 34. Kopunye F, Mola G, Woods C, de Costa C. Induced abortion in Papua-New Guinea:  
559 Experience and opinions of health professionals. *Australian and New Zealand Journal of  
560 Obstetrics and Gynaecology*. 2021 Dec 1;61(6):961–8.
- 561 35. Vallely LM, Homiehombo P, Kelly-Hanku A, Whittaker A. Unsafe abortion requiring hospital  
562 admission in the Eastern Highlands of Papua New Guinea - a descriptive study of women’s  
563 and health care workers’ experiences. *Reproductive Health*. 2015 Mar 21;12(1):22.
- 564 36. de Costa C, Mola G. A review of maternal deaths at Goroka General Hospital, Papua New  
565 Guinea 2005-2008. *Australian and New Zealand Journal of Obstetrics and Gynaecology*.  
566 2009;1.
- 567 37. Bolnga JW, Lufele E, Teno M, Agua V, Ao P, DL Mola G, et al. Incidence of self-induced  
568 abortion with misoprostol, admitted to a provincial hospital in Papua New Guinea: A  
569 prospective observational study. *Australian and New Zealand Journal of Obstetrics and  
570 Gynaecology*. 2021 Dec 1;61(6):955–60.

- 571 38. Bago BJ, Hibstu DT, Woldemariam SH. Prevalence of pregnancy termination and its  
572 associated factors among women of reproductive age group in Ethiopia using 2011 Ethiopian  
573 demography and health survey, 2016. *J Preg Child Health*. 2016;4(6).
- 574 39. Hailegebreal S, Enyew EB, Simegn AE, Seboka BT, Gilano G, Kassa R, et al. Pooled  
575 prevalence and associated factors of pregnancy termination among youth aged 15–24 year  
576 women in East Africa: Multilevel level analysis. *PLOS ONE*. 2022 Dec 22;17(12):e0275349.
- 577 40. Hansen AM. Goodness-of-fit tests for autoregressive logistic regression models and  
578 generalized linear mixed models. University of California, Riverside; 2012.
- 579 41. Archer KJ, Lemeshow S, Hosmer DW. Goodness-of-fit tests for logistic regression models  
580 when data are collected using a complex sampling design. *Computational Statistics & Data  
581 Analysis*. 2007 May 15;51(9):4450–64.
- 582 42. Sesay FR, Anaba EA, Manu A, Maya E, Torpey K, Adanu RMK. Determinants of induced  
583 abortion among women of reproductive age: evidence from the 2013 and 2019 Sierra Leone  
584 Demographic and Health Survey. *BMC Women’s Health*. 2023 Feb 1;23(1):44.
- 585 43. Dickson KS, Adde KS, Ahinkorah BO. Socio – economic determinants of abortion among  
586 women in Mozambique and Ghana: evidence from demographic and health survey. *Archives  
587 of Public Health*. 2018 Jul 19;76(1):37.
- 588 44. Attali E, Yogev Y. The impact of advanced maternal age on pregnancy outcome. *Best Practice  
589 & Research Clinical Obstetrics & Gynaecology*. 2021 Jan 1;70:2–9.
- 590 45. Pinheiro RL, Areia AL, Mota Pinto A, Donato H. Advanced Maternal Age: Adverse  
591 Outcomes of Pregnancy, A Meta-Analysis. *Acta Med Port*. 2019 Mar 29;32(3):219–26.
- 592 46. Eunice Ojo I, Olumuyiwa Ojo T, Okechukwu Orji E. Why do married women procure  
593 abortion? Experiences from Ile-Ife, south western Nigeria. *Afr H Sci*. 2021 Apr 16;21(1):327–  
594 37.
- 595 47. Moseson H, Jayaweera R, Raifman S, Keefe-Oates B, Filippa S, Motana R, et al. Self-  
596 managed medication abortion outcomes: results from a prospective pilot study. *Reproductive  
597 Health*. 2020 Oct 27;17(1):164.
- 598 48. Sanni Yaya, Agbessi Amouzou, Olalekan A Uthman, Michael Ekholuenetale, Ghose  
599 Bishwajit, Ogochukwu Udenigwe, et al. Prevalence and determinants of terminated and  
600 unintended pregnancies among married women: analysis of pooled cross-sectional surveys in  
601 Nigeria. *BMJ Global Health*. 2018 Mar 1;3(2):e000707.
- 602 49. Biggs MA, Gould H, Foster DG. Understanding why women seek abortions in the US. *BMC  
603 Womens Health*. 2013 Jul 5;13:29.
- 604 50. Chae S, Desai S, Crowell M, Sedgh G. Reasons why women have induced abortions: a  
605 synthesis of findings from 14 countries. *Contraception*. 2017 Oct;96(4):233–41.
- 606 51. Smith C, Vannak U, Sokhey L, Ngo TD, Gold J, Free C. Mobile Technology for Improved  
607 Family Planning (MOTIF): the development of a mobile phone-based (mHealth) intervention  
608 to support post-abortion family planning (PAFP) in Cambodia. *Reproductive Health*. 2016 Jan  
609 5;13(1):1.
- 610 52. Gill R, Ogilvie G, Norman WV, Fitzsimmons B, Maher C, Renner R. Feasibility and  
611 Acceptability of a Mobile Technology Intervention to Support Postabortion Care in British  
612 Columbia: Phase I. *J Med Internet Res*. 2019 May 29;21(5):e13387.
- 613 53. Mangone ER, Lebrun V, Muessig KE. Mobile Phone Apps for the Prevention of Unintended  
614 Pregnancy: A Systematic Review and Content Analysis. *JMIR mHealth uHealth*. 2016 Jan  
615 19;4(1):e6.

- 616 54. Stifani BM, Peters M, French K, Gill RK. There's an App for it: A systematic review of  
617 mobile apps providing information about abortion using a revised MARS scale. *PLOS Digital*  
618 *Health*. 2023 Jul 17;2(7):e0000277.
- 619 55. Arthur-Holmes F, Aboagye RG, Dadzie LK, Agbaglo E, Okyere J, Seidu AA, et al. Intimate  
620 Partner Violence and Pregnancy Termination Among Women in Sub-Saharan Africa. *J*  
621 *Interpers Violence*. 2023 Jan 1;38(1–2):2092–111.
- 622 56. Rahman M. Intimate partner violence and termination of pregnancy: a cross-sectional study of  
623 married Bangladeshi women. *Reproductive Health*. 2015 Nov 5;12(1):102.
- 624 57. Bagheri R, Farahani FK, Ebrahimi M. Domestic Violence and Its Impact on Abortion in Iran:  
625 Evidence From a Nationally Representative Survey. *J Interpers Violence*. 2023 Aug 1;38(15–  
626 16):9492–513.
- 627 58. Agyemang-Duah W, Asare BYA, Adu C, Agyekum AK, Peprah P. Intimate partner violence  
628 as a determinant of pregnancy termination among women in unions: evidence from the 2016–  
629 2018 Papua New Guinea Demographic and Health Survey. *Journal of Biosocial Science*.  
630 2023/05/22 ed. 2023;1–14.
- 631 59. Darko E, Smith W, Walker D. Gender Violence in Papua New Guinea. *The cost of business*.  
632 2015;
- 633 60. Ahinkorah BO, Aboagye RG, Cadri A, Salihu T, Seidu AA, Yaya S. Exposure to interparental  
634 violence and intimate partner violence among women in Papua New Guinea. *BMC Women's*  
635 *Health*. 2023 Feb 7;23(1):48.
- 636 61. Government of Papua New Guinea. Papua New Guinea Strategy to Prevent and Respond to  
637 Gender Based Violence 2016-2025. Government of Papua New Guinea; 2012.
- 638 62. Jayaweera RT, Ngui FM, Hall KS, Gerdts C. Women's experiences with unplanned pregnancy  
639 and abortion in Kenya: A qualitative study. *PLOS ONE*. 2018 Jan 25;13(1):e0191412.
- 640 63. Alene M, Yismaw L, Berelie Y, Kassie B, Yeshambel R, Assemie MA. Prevalence and  
641 determinants of unintended pregnancy in Ethiopia: A systematic review and meta-analysis of  
642 observational studies. *PLOS ONE*. 2020 Apr 7;15(4):e0231012.
- 643 64. Bekele YA, Fekadu GA. Factors associated with unintended pregnancy in Ethiopia; further  
644 analysis of the 2016 Ethiopian demographic health survey data. *BMC Pregnancy and*  
645 *Childbirth*. 2021 Jul 6;21(1):486.
- 646 65. D'Souza P, Bailey JV, Stephenson J, Oliver S. Factors influencing contraception choice and  
647 use globally: a synthesis of systematic reviews. *The European Journal of Contraception &*  
648 *Reproductive Health Care*. 2022 Sep 3;27(5):364–72.
- 649 66. Ojo IE, Ojo TO, Orji EO. Why do married women procure abortion? Experiences from Ile-Ife,  
650 south western Nigeria. *Afr Health Sci*. 2021 Mar;21(1):327–37.
- 651 67. Yogi A, K.C P, Neupane S. Prevalence and factors associated with abortion and unsafe  
652 abortion in Nepal: a nationwide cross-sectional study. *BMC Pregnancy and Childbirth*. 2018  
653 Sep 17;18(1):376.
- 654 68. Vallely LM, Homiehombo P, Kelly-Hanku A, Kumbia A, Mola GDL, Whittaker A. Hospital  
655 Admission following Induced Abortion in Eastern Highlands Province, Papua New Guinea –  
656 A Descriptive Study. *PLOS ONE*. 2014 Oct 17;9(10):e110791.
- 657 69. Demissie GD, Akalu Y, Gelagay AA, Alemnew W, Yeshaw Y. Factors associated with  
658 decision-making power of married women to use family planning in sub-Saharan Africa: a  
659 multilevel analysis of demographic health surveys. *BMC Public Health*. 2022 Apr  
660 26;22(1):837.

- 661 70. Bolarinwa OA, Afaya A, Ajayi KV, Ojo A, Alawode OA. Prevalence and factors associated  
662 with the use of long-acting reversible and permanent contraceptive methods among women  
663 who desire no more children in high fertility countries in sub-saharan Africa. BMC Public  
664 Health. 2022 Nov 21;22(1):2141.
- 665 71. Mohammed A, Woldeyohannes D, Feleke A, Megabiaw B. Determinants of modern  
666 contraceptive utilization among married women of reproductive age group in North Shoa  
667 Zone, Amhara Region, Ethiopia. Reproductive Health. 2014 Feb 3;11(1):13.
- 668

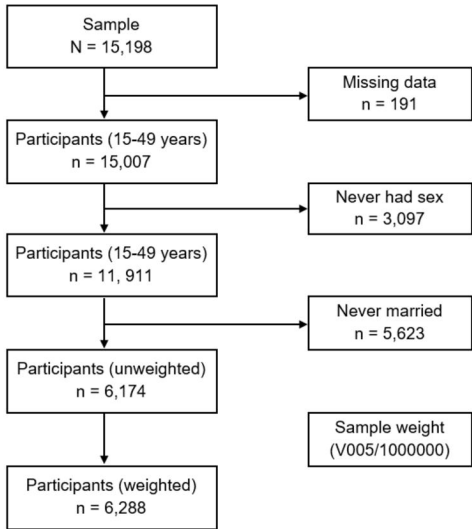

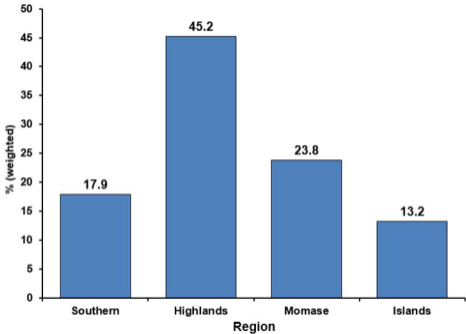

Source: https://medrxiv.org/content/10.1101/2024.06.19.24309129v2.full.pdf
